# Supplementary material
Source: MDPI journal article supplement (doi:10.3390/neuroglia7010008)
Supplement: s1 [file SupplementMaterials_Neuroglia_Endo_Y_et al._20260119.pdf › SupplementMaterials_Neuroglia_Endo_Y_et al._20260119.pdf]

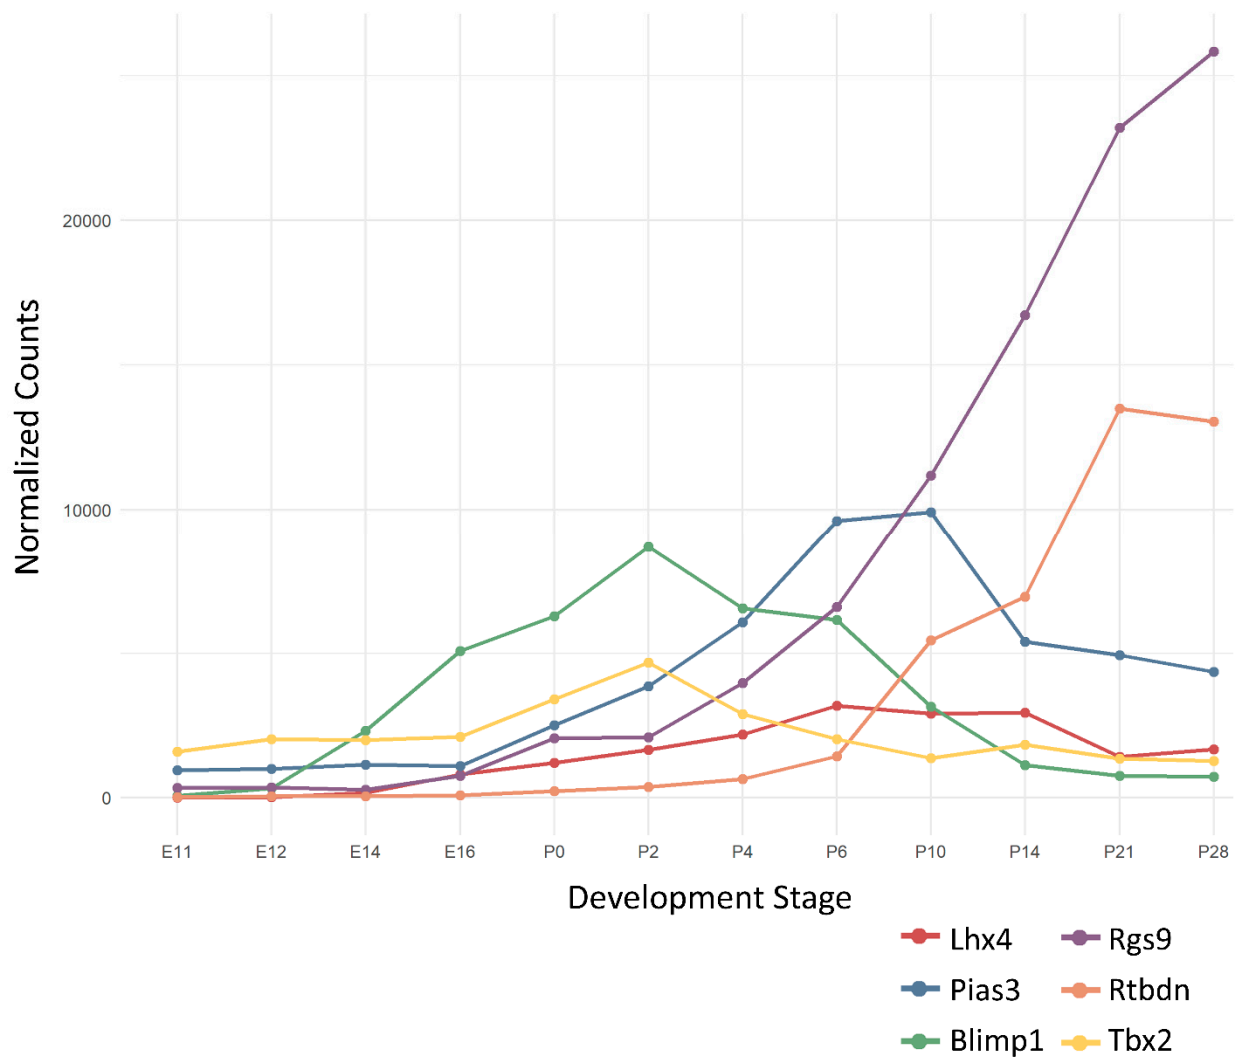

**Figure S1.** Expression of Lhx4, Pias3, Blimp1, Rgs9, Rtbdn, and Tbx2 in the mouse retina from embryonic day 11 to postnatal day 28

| GO_Biological process |                                           |          |          | GO_Cellular component |                                                               |          |          |
|-----------------------|-------------------------------------------|----------|----------|-----------------------|---------------------------------------------------------------|----------|----------|
| GO.ID                 | Description                               | p-Value  | FDR      | GO.ID                 | Description                                                   | p-Value  | FDR      |
| GO:0065007            | biological regulation                     | 3.49E-38 | 3.49E-38 | GO:0005737            | cytoplasm                                                     | 1.79E-97 | 1.79E-97 |
| GO:0050789            | regulation of biological process          | 2.00E-33 | 2.00E-33 | GO:0016020            | membrane                                                      | 1.10E-46 | 1.10E-46 |
| GO:0050896            | response to stimulus                      | 8.95E-32 | 8.95E-32 | GO:0012505            | endomembrane system                                           | 1.93E-42 | 1.93E-42 |
| GO:0050794            | regulation of cellular process            | 2.67E-27 | 2.67E-27 | GO:0005773            | vacuole                                                       | 4.05E-31 | 4.05E-31 |
| GO:0051716            | cellular response to stimulus             | 1.21E-25 | 1.21E-25 | GO:0031090            | organelle membrane                                            | 9.23E-31 | 9.23E-31 |
| GO:0051179            | localization                              | 1.40E-25 | 1.40E-25 | GO:0000323            | lytic vacuole                                                 | 8.02E-26 | 8.02E-26 |
| GO:0009056            | catabolic process                         | 1.04E-24 | 1.04E-24 | GO:0005764            | lysosome                                                      | 8.02E-26 | 8.02E-26 |
| GO:0051234            | establishment of localization             | 3.91E-21 | 3.91E-21 | GO:0005783            | endoplasmic reticulum                                         | 3.46E-23 | 3.46E-23 |
| GO:0006810            | transport                                 | 7.82E-21 | 7.82E-21 | GO:0005774            | vacuolar membrane                                             | 1.99E-22 | 1.99E-22 |
| GO:0044281            | small molecule metabolic process          | 5.65E-20 | 5.65E-20 | GO:0098852            | lytic vacuole membrane                                        | 3.88E-19 | 3.88E-19 |
| GO:0006950            | response to stress                        | 3.08E-18 | 3.08E-18 | GO:0005765            | lysosomal membrane                                            | 3.88E-19 | 3.88E-19 |
| GO:0048583            | regulation of response to stimulus        | 2.61E-17 | 2.61E-17 | GO:0031982            | vesicle                                                       | 4.06E-19 | 4.06E-19 |
| GO:0032501            | multicellular organismal process          | 4.67E-17 | 4.67E-17 | GO:0098588            | bounding membrane of organelle                                | 1.24E-18 | 1.24E-18 |
| GO:0048518            | positive regulation of biological process | 4.71E-17 | 4.71E-17 | GO:0031410            | cytoplasmic vesicle                                           | 2.01E-18 | 2.01E-18 |
| GO:0007154            | cell communication                        | 7.96E-17 | 7.96E-17 | GO:0071944            | cell periphery                                                | 2.06E-18 | 2.06E-18 |
| GO:0023052            | signaling                                 | 1.23E-16 | 1.23E-16 | GO:0097708            | intracellular vesicle                                         | 2.65E-18 | 2.65E-18 |
| GO:0007165            | signal transduction                       | 3.87E-15 | 3.87E-15 | GO:0005886            | plasma membrane                                               | 9.84E-18 | 9.84E-18 |
| GO:0048522            | positive regulation of cellular process   | 1.22E-14 | 1.22E-14 | GO:0005794            | Golgi apparatus                                               | 4.27E-13 | 4.27E-13 |
| GO:0006629            | lipid metabolic process                   | 4.28E-14 | 4.28E-14 | GO:0005768            | endosome                                                      | 1.39E-12 | 1.39E-12 |
| GO:0032502            | developmental process                     | 6.66E-14 | 6.66E-14 | GO:0031984            | organelle subcompartment                                      | 2.45E-12 | 2.45E-12 |
| GO:0023051            | regulation of signaling                   | 6.53E-13 | 6.53E-13 | GO:0005829            | cytosol                                                       | 5.79E-12 | 5.79E-12 |
| GO:0010646            | regulation of cell communication          | 7.74E-13 | 7.74E-13 | GO:0005739            | mitochondrion                                                 | 5.35E-11 | 5.35E-11 |
| GO:0006082            | organic acid metabolic process            | 7.88E-13 | 7.88E-13 | GO:0042175            | nuclear outer membrane-endoplasmic reticulum membrane network | 7.59E-11 | 7.59E-11 |
| GO:0019752            | carboxylic acid metabolic process         | 1.19E-12 | 1.19E-12 | GO:0042995            | cell projection                                               | 2.37E-10 | 2.37E-10 |
| GO:0043436            | oxoacid metabolic process                 | 1.33E-12 | 1.33E-12 | GO:0098827            | endoplasmic reticulum subcompartment                          | 3.50E-10 | 3.50E-10 |
| GO:0009966            | regulation of signal transduction         | 1.59E-12 | 1.59E-12 | GO:0005789            | endoplasmic reticulum membrane                                | 3.82E-10 | 3.82E-10 |
| GO:0048856            | anatomical structure development          | 5.75E-12 | 5.75E-12 | GO:0120025            | plasma membrane bounded cell projection                       | 6.19E-10 | 6.19E-10 |
| GO:0005975            | carbohydrate metabolic process            | 6.72E-11 | 6.72E-11 | GO:0012506            | vesicle membrane                                              | 7.20E-09 | 7.20E-09 |
| GO:0051641            | cellular localization                     | 8.93E-11 | 8.93E-11 | GO:0030659            | cytoplasmic vesicle membrane                                  | 7.74E-09 | 7.74E-09 |
| GO:0070887            | cellular response to chemical stimulus    | 2.59E-10 | 2.59E-10 | GO:0031902            | late endosome membrane                                        | 1.08E-07 | 1.08E-07 |
| GO:0042221            | response to chemical                      | 7.01E-10 | 7.01E-10 | GO:0005770            | late endosome                                                 | 1.54E-07 | 1.54E-07 |

|            |                                                      |          |          |            |                                                                 |          |          |
|------------|------------------------------------------------------|----------|----------|------------|-----------------------------------------------------------------|----------|----------|
| GO:0032787 | monocarboxylic acid metabolic process                | 7.04E-10 | 7.04E-10 | GO:0010008 | endosome membrane                                               | 1.60E-07 | 1.60E-07 |
| GO:0019637 | organophosphate metabolic process                    | 1.46E-09 | 1.46E-09 | GO:0005929 | cilium                                                          | 1.29E-06 | 1.29E-06 |
| GO:0006793 | phosphorus metabolic process                         | 2.77E-09 | 2.77E-09 | GO:0090533 | cation-transporting ATPase complex                              | 6.27E-06 | 6.27E-06 |
| GO:0006796 | phosphate-containing compound metabolic process      | 2.88E-09 | 2.88E-09 | GO:0098590 | plasma membrane region                                          | 7.08E-06 | 7.08E-06 |
| GO:0048584 | positive regulation of response to stimulus          | 3.20E-09 | 3.20E-09 | GO:0022626 | cytosolic ribosome                                              | 7.20E-06 | 7.20E-06 |
| GO:0007166 | cell surface receptor signaling pathway              | 5.15E-09 | 5.15E-09 | GO:0030054 | cell junction                                                   | 8.00E-06 | 8.00E-06 |
| GO:1901136 | carbohydrate derivative catabolic process            | 2.73E-08 | 2.73E-08 | GO:0033176 | proton-transporting V-type ATPase complex                       | 9.27E-06 | 9.27E-06 |
| GO:0042592 | homeostatic process                                  | 3.99E-08 | 3.99E-08 | GO:0045202 | synapse                                                         | 2.58E-05 | 2.58E-05 |
| GO:0048731 | system development                                   | 5.56E-08 | 5.56E-08 | GO:0098533 | ATPase dependent transmembrane transport complex                | 3.56E-05 | 3.56E-05 |
| GO:1901135 | carbohydrate derivative metabolic process            | 1.17E-07 | 1.17E-07 | GO:0005776 | autophagosome                                                   | 7.45E-05 | 7.45E-05 |
| GO:0006996 | organelle organization                               | 1.18E-07 | 1.18E-07 | GO:0110165 | cellular anatomical structure                                   | 2.47E-04 | 2.47E-04 |
| GO:0033554 | cellular response to stress                          | 2.01E-07 | 2.01E-07 | GO:0033178 | proton-transporting two-sector ATPase complex, catalytic domain | 4.28E-04 | 4.28E-04 |
| GO:0046434 | organophosphate catabolic process                    | 2.63E-07 | 2.63E-07 | GO:0033180 | proton-transporting V-type ATPase, V1 domain                    | 4.28E-04 | 4.28E-04 |
| GO:0019538 | protein metabolic process                            | 2.64E-07 | 2.64E-07 | GO:0005856 | cytoskeleton                                                    | 4.47E-04 | 4.47E-04 |
| GO:0030030 | cell projection organization                         | 2.73E-07 | 2.73E-07 | GO:0005740 | mitochondrial envelope                                          | 6.31E-04 | 6.31E-04 |
| GO:0016052 | carbohydrate catabolic process                       | 3.04E-07 | 3.04E-07 | GO:0005811 | lipid droplet                                                   | 1.06E-03 | 1.06E-03 |
| GO:0120036 | plasma membrane bounded cell projection organization | 3.35E-07 | 3.35E-07 | GO:0043005 | neuron projection                                               | 1.55E-03 | 1.55E-03 |
| GO:0044282 | small molecule catabolic process                     | 6.72E-07 | 6.72E-07 | GO:0031966 | mitochondrial membrane                                          | 1.77E-03 | 1.77E-03 |
| GO:0071705 | nitrogen compound transport                          | 8.21E-07 | 8.21E-07 | GO:0022627 | cytosolic small ribosomal subunit                               | 2.07E-03 | 2.07E-03 |
| GO:0007275 | multicellular organism development                   | 1.04E-06 | 1.04E-06 | GO:0016469 | proton-transporting two-sector ATPase complex                   | 2.47E-03 | 2.47E-03 |
| GO:0065008 | regulation of biological quality                     | 1.08E-06 | 1.08E-06 | GO:0005576 | extracellular region                                            | 2.49E-03 | 2.49E-03 |
| GO:0010647 | positive regulation of cell communication            | 1.1E-06  | 1.1E-06  | GO:0015630 | microtubule cytoskeleton                                        | 3.96E-03 | 3.96E-03 |
| GO:0009967 | positive regulation of signal transduction           | 1.14E-06 | 1.14E-06 | GO:0005815 | microtubule organizing center                                   | 4.74E-03 | 4.74E-03 |
| GO:0006631 | fatty acid metabolic process                         | 1.8E-06  | 1.8E-06  | GO:0022625 | cytosolic large ribosomal subunit                               | 4.78E-03 | 4.78E-03 |
| GO:0043603 | amide metabolic process                              | 2.43E-06 | 2.43E-06 | GO:0099503 | secretory vesicle                                               | 6.78E-03 | 6.78E-03 |
| GO:0048869 | cellular developmental process                       | 2.52E-06 | 2.52E-06 | GO:0031967 | organelle envelope                                              | 6.91E-03 | 6.91E-03 |
| GO:0030154 | cell differentiation                                 | 2.52E-06 | 2.52E-06 | GO:0005813 | centrosome                                                      | 7.01E-03 | 7.01E-03 |
| GO:0023056 | positive regulation of signaling                     | 2.75E-06 | 2.75E-06 | GO:0098794 | postsynapse                                                     | 8.87E-03 | 8.87E-03 |
| GO:0048585 | negative regulation of response to stimulus          | 3.38E-06 | 3.38E-06 | GO:0030496 | midbody                                                         | 1.37E-02 | 1.37E-02 |
| GO:0051239 | regulation of multicellular organismal process       | 3.4E-06  | 3.4E-06  | GO:0035869 | ciliary transition zone                                         | 1.38E-02 | 1.38E-02 |

|            |                                                       |          |          |            |                                                           |          |          |
|------------|-------------------------------------------------------|----------|----------|------------|-----------------------------------------------------------|----------|----------|
| GO:0008219 | cell death                                            | 4.25E-06 | 4.25E-06 | GO:0005615 | extracellular space                                       | 1.49E-02 | 1.49E-02 |
| GO:0012501 | programmed cell death                                 | 4.25E-06 | 4.25E-06 | GO:0030424 | axon                                                      | 2.14E-02 | 2.14E-02 |
| GO:0051649 | establishment of<br>localization in cell              | 4.37E-06 | 4.37E-06 | GO:0048471 | perinuclear region of<br>cytoplasm                        | 2.75E-02 | 2.75E-02 |
| GO:0055085 | transmembrane<br>transport                            | 5.13E-06 | 5.13E-06 | GO:0016471 | vacuolar proton-<br>transporting V-type<br>ATPase complex | 3.38E-02 | 3.38E-02 |
| GO:0035556 | intracellular signal<br>transduction                  | 5.5E-06  | 5.5E-06  | GO:0030990 | intraciliary transport<br>particle                        | 3.91E-02 | 3.91E-02 |
| GO:0033036 | macromolecule<br>localization                         | 5.64E-06 | 5.64E-06 | GO:0014069 | postsynaptic density                                      | 4.16E-02 | 4.16E-02 |
| GO:0080134 | regulation of response to<br>stress                   | 5.97E-06 | 5.97E-06 | GO:0030133 | transport vesicle                                         | 4.70E-02 | 4.70E-02 |
| GO:1902531 | regulation of<br>intracellular signal<br>transduction | 6.81E-06 | 6.81E-06 | GO:0098978 | glutamatergic synapse                                     | 4.95E-02 | 4.95E-02 |

**Table S1. Gene Ontogeny terms of upregulated gene**

| GO_Biological process |                                                                |           |           | GO_Cellular component |                                          |          |          |
|-----------------------|----------------------------------------------------------------|-----------|-----------|-----------------------|------------------------------------------|----------|----------|
| GO.ID                 | Description                                                    | p-Value   | FDR       | GO.ID                 | Description                              | p-Value  | FDR      |
| GO:0050789            | regulation of biological process                               | 2.35E-103 | 2.35E-103 | GO:0005654            | nucleoplasm                              | 1.08E-97 | 1.08E-97 |
| GO:0050794            | regulation of cellular process                                 | 1.07E-101 | 1.07E-101 | GO:0005694            | chromosome                               | 2.66E-68 | 2.66E-68 |
| GO:0065007            | biological regulation                                          | 4.57E-99  | 4.57E-99  | GO:0005737            | cytoplasm                                | 4.54E-57 | 4.54E-57 |
| GO:0080090            | regulation of primary metabolic process                        | 1.43E-78  | 1.43E-78  | GO:0005829            | cytosol                                  | 2.79E-44 | 2.79E-44 |
| GO:0019219            | regulation of nucleobase-containing compound metabolic process | 9.38E-63  | 9.38E-63  | GO:1902494            | catalytic complex                        | 7.04E-42 | 7.04E-42 |
| GO:0060255            | regulation of macromolecule metabolic process                  | 1.38E-61  | 1.38E-61  | GO:0000785            | chromatin                                | 3.45E-35 | 3.45E-35 |
| GO:0048518            | positive regulation of biological process                      | 1.09E-60  | 1.09E-60  | GO:0005856            | cytoskeleton                             | 1.79E-28 | 1.79E-28 |
| GO:0007049            | cell cycle                                                     | 1.21E-59  | 1.21E-59  | GO:0098687            | chromosomal region                       | 1.75E-26 | 1.75E-26 |
| GO:0048522            | positive regulation of cellular process                        | 9.82E-58  | 9.82E-58  | GO:1990234            | transferase complex                      | 1.07E-24 | 1.07E-24 |
| GO:0019222            | regulation of metabolic process                                | 1.30E-57  | 1.30E-57  | GO:0140535            | intracellular protein-containing complex | 3.05E-24 | 3.05E-24 |
| GO:0022402            | cell cycle process                                             | 2.24E-56  | 2.24E-56  | GO:0000775            | chromosome, centromeric region           | 1.78E-23 | 1.78E-23 |
| GO:0051252            | regulation of RNA metabolic process                            | 5.84E-50  | 5.84E-50  | GO:0099080            | supramolecular complex                   | 5.04E-21 | 5.04E-21 |
| GO:0010556            | regulation of macromolecule biosynthetic process               | 3.99E-45  | 3.99E-45  | GO:0000793            | condensed chromosome                     | 1.77E-18 | 1.77E-18 |
| GO:0009889            | regulation of biosynthetic process                             | 1.59E-44  | 1.59E-44  | GO:0015630            | microtubule cytoskeleton                 | 1.90E-17 | 1.90E-17 |
| GO:0048523            | negative regulation of cellular process                        | 1.26E-43  | 1.26E-43  | GO:0016604            | nuclear body                             | 7.29E-17 | 7.29E-17 |
| GO:0006996            | organelle organization                                         | 8.02E-43  | 8.02E-43  | GO:0005681            | spliceosomal complex                     | 1.76E-16 | 1.76E-16 |
| GO:0051716            | cellular response to stimulus                                  | 3.77E-42  | 3.77E-42  | GO:0000228            | nuclear chromosome                       | 2.03E-15 | 2.03E-15 |
| GO:0010468            | regulation of gene expression                                  | 5.50E-42  | 5.50E-42  | GO:0000779            | condensed chromosome, centromeric region | 5.57E-15 | 5.57E-15 |
| GO:0048519            | negative regulation of biological process                      | 1.15E-41  | 1.15E-41  | GO:0043233            | organelle lumen                          | 6.82E-15 | 6.82E-15 |
| GO:1903047            | mitotic cell cycle process                                     | 5.53E-41  | 5.53E-41  | GO:0070013            | intracellular organelle lumen            | 6.82E-15 | 6.82E-15 |
| GO:0000278            | mitotic cell cycle                                             | 1.10E-40  | 1.10E-40  | GO:0031974            | membrane-enclosed lumen                  | 6.82E-15 | 6.82E-15 |
| GO:0006351            | DNA-templated transcription                                    | 1.83E-40  | 1.83E-40  | GO:0000776            | kinetochore                              | 2.54E-14 | 2.54E-14 |
| GO:0006259            | DNA metabolic process                                          | 6.91E-38  | 6.91E-38  | GO:0005819            | spindle                                  | 4.75E-14 | 4.75E-14 |
| GO:0010604            | positive regulation of macromolecule metabolic process         | 2.77E-37  | 2.77E-37  | GO:0005622            | intracellular anatomical structure       | 2.54E-13 | 2.54E-13 |
| GO:2001141            | regulation of RNA biosynthetic process                         | 1.57E-36  | 1.57E-36  | GO:0031981            | nuclear lumen                            | 4.57E-13 | 4.57E-13 |
| GO:0050896            | response to stimulus                                           | 4.79E-36  | 4.79E-36  | GO:0071013            | catalytic step 2 spliceosome             | 1.26E-12 | 1.26E-12 |
| GO:0006355            | regulation of DNA-templated transcription                      | 5.32E-36  | 5.32E-36  | GO:0015629            | actin cytoskeleton                       | 2.20E-12 | 2.20E-12 |
| GO:0009893            | positive regulation of metabolic process                       | 1.29E-35  | 1.29E-35  | GO:0005813            | centrosome                               | 2.27E-12 | 2.27E-12 |

|            |                                                                         |          |          |            |                                                                |          |          |
|------------|-------------------------------------------------------------------------|----------|----------|------------|----------------------------------------------------------------|----------|----------|
| GO:0051726 | regulation of cell cycle                                                | 2.32E-35 | 2.32E-35 | GO:0005815 | microtubule organizing center                                  | 2.22E-11 | 2.22E-11 |
| GO:0045935 | positive regulation of nucleobase-containing compound metabolic process | 3.00E-35 | 3.00E-35 | GO:0005635 | nuclear envelope                                               | 2.47E-11 | 2.47E-11 |
| GO:0051276 | chromosome organization                                                 | 1.13E-32 | 1.13E-32 | GO:0072686 | mitotic spindle                                                | 1.78E-10 | 1.78E-10 |
| GO:0032502 | developmental process                                                   | 2.81E-31 | 2.81E-31 | GO:0000502 | proteasome complex                                             | 9.79E-10 | 9.79E-10 |
| GO:0048856 | anatomical structure development                                        | 1.25E-30 | 1.25E-30 | GO:0035770 | ribonucleoprotein granule                                      | 1.90E-09 | 1.90E-09 |
| GO:0045934 | negative regulation of nucleobase-containing compound metabolic process | 8.28E-30 | 8.28E-30 | GO:0070161 | anchoring junction                                             | 2.65E-09 | 2.65E-09 |
| GO:0007059 | chromosome segregation                                                  | 9.46E-30 | 9.46E-30 | GO:0016607 | nuclear speck                                                  | 4.13E-09 | 4.13E-09 |
| GO:0035556 | intracellular signal transduction                                       | 9.95E-30 | 9.95E-30 | GO:0036464 | cytoplasmic ribonucleoprotein granule                          | 4.78E-09 | 4.78E-09 |
| GO:0051254 | positive regulation of RNA metabolic process                            | 1.99E-29 | 1.99E-29 | GO:0010494 | cytoplasmic stress granule                                     | 7.83E-09 | 7.83E-09 |
| GO:0007165 | signal transduction                                                     | 2.08E-29 | 2.08E-29 | GO:0032991 | protein-containing complex                                     | 1.32E-08 | 1.32E-08 |
| GO:0010564 | regulation of cell cycle process                                        | 3.52E-29 | 3.52E-29 | GO:0022624 | proteasome accessory complex                                   | 1.45E-08 | 1.45E-08 |
| GO:0010605 | negative regulation of macromolecule metabolic process                  | 9.91E-28 | 9.91E-28 | GO:0034708 | methyltransferase complex                                      | 7.07E-08 | 7.07E-08 |
| GO:0009891 | positive regulation of biosynthetic process                             | 3.81E-27 | 3.81E-27 | GO:0061695 | transferase complex, transferring phosphorus-containing groups | 2.00E-07 | 2.00E-07 |
| GO:0006950 | response to stress                                                      | 6.80E-27 | 6.80E-27 | GO:0030684 | preribosome                                                    | 4.57E-07 | 4.57E-07 |
| GO:0009892 | negative regulation of metabolic process                                | 7.02E-27 | 7.02E-27 | GO:0110165 | cellular anatomical structure                                  | 4.95E-07 | 4.95E-07 |
| GO:0010557 | positive regulation of macromolecule biosynthetic process               | 1.16E-26 | 1.16E-26 | GO:0031965 | nuclear membrane                                               | 1.27E-06 | 1.27E-06 |
| GO:0007010 | cytoskeleton organization                                               | 7.50E-26 | 7.50E-26 | GO:0005684 | U2-type spliceosomal complex                                   | 1.32E-06 | 1.32E-06 |
| GO:0023052 | signaling                                                               | 1.47E-25 | 1.47E-25 | GO:1905368 | peptidase complex                                              | 1.48E-06 | 1.48E-06 |
| GO:0007154 | cell communication                                                      | 1.57E-25 | 1.57E-25 | GO:0032040 | small-subunit processome                                       | 1.67E-06 | 1.67E-06 |
| GO:0051128 | regulation of cellular component organization                           | 1.76E-25 | 1.76E-25 | GO:1905369 | endopeptidase complex                                          | 1.70E-06 | 1.70E-06 |
| GO:0098813 | nuclear chromosome segregation                                          | 2.42E-25 | 2.42E-25 | GO:0001650 | fibrillar center                                               | 1.71E-06 | 1.71E-06 |
| GO:0051253 | negative regulation of RNA metabolic process                            | 4.04E-25 | 4.04E-25 | GO:0031248 | protein acetyltransferase complex                              | 2.10E-06 | 2.10E-06 |
| GO:0033043 | regulation of organelle organization                                    | 7.25E-25 | 7.25E-25 | GO:1902493 | acetyltransferase complex                                      | 2.10E-06 | 2.10E-06 |
| GO:0048583 | regulation of response to stimulus                                      | 7.56E-25 | 7.56E-25 | GO:0031252 | cell leading edge                                              | 2.29E-06 | 2.29E-06 |
| GO:0033554 | cellular response to stress                                             | 2.62E-24 | 2.62E-24 | GO:0099512 | supramolecular fiber                                           | 3.41E-06 | 3.41E-06 |
| GO:0006366 | transcription by RNA polymerase II                                      | 9.31E-24 | 9.31E-24 | GO:0099081 | supramolecular polymer                                         | 7.52E-06 | 7.52E-06 |
| GO:0007275 | multicellular organism development                                      | 1.21E-23 | 1.21E-23 | GO:0000922 | spindle pole                                                   | 8.05E-06 | 8.05E-06 |
| GO:0051641 | cellular localization                                                   | 1.33E-23 | 1.33E-23 | GO:0099513 | polymeric cytoskeletal fiber                                   | 9.25E-06 | 9.25E-06 |
| GO:0006260 | DNA replication                                                         | 2.82E-23 | 2.82E-23 | GO:0031967 | organelle envelope                                             | 9.41E-06 | 9.41E-06 |

|            |                                                           |          |          |            |                                  |          |          |
|------------|-----------------------------------------------------------|----------|----------|------------|----------------------------------|----------|----------|
| GO:0140694 | membraneless organelle assembly                           | 5.46E-23 | 5.46E-23 | GO:0005643 | nuclear pore                     | 1.05E-05 | 1.05E-05 |
| GO:0140014 | mitotic nuclear division                                  | 7.55E-23 | 7.55E-23 | GO:0005911 | cell-cell junction               | 1.24E-05 | 1.24E-05 |
| GO:0033036 | macromolecule localization                                | 8.13E-23 | 8.13E-23 | GO:0005667 | transcription regulator complex  | 1.62E-05 | 1.62E-05 |
| GO:0006325 | chromatin organization                                    | 9.61E-23 | 9.61E-23 | GO:0005838 | proteasome regulatory particle   | 1.71E-05 | 1.71E-05 |
| GO:0044770 | cell cycle phase transition                               | 1.48E-22 | 1.48E-22 | GO:0030054 | cell junction                    | 2.61E-05 | 2.61E-05 |
| GO:0051052 | regulation of DNA metabolic process                       | 1.49E-22 | 1.49E-22 | GO:0030055 | cell-substrate junction          | 2.97E-05 | 2.97E-05 |
| GO:0000819 | sister chromatid segregation                              | 6.47E-22 | 6.47E-22 | GO:0000792 | heterochromatin                  | 3.23E-05 | 3.23E-05 |
| GO:0010558 | negative regulation of macromolecule biosynthetic process | 8.04E-22 | 8.04E-22 | GO:0000940 | outer kinetochore                | 4.13E-05 | 4.13E-05 |
| GO:0000070 | mitotic sister chromatid segregation                      | 8.74E-22 | 8.74E-22 | GO:0005925 | focal adhesion                   | 5.63E-05 | 5.63E-05 |
| GO:0006974 | DNA damage response                                       | 1.01E-21 | 1.01E-21 | GO:0005657 | replication fork                 | 6.05E-05 | 6.05E-05 |
| GO:0006357 | regulation of transcription by RNA polymerase II          | 1.75E-21 | 1.75E-21 | GO:0070603 | SWI/SNF superfamily-type complex | 1.13E-04 | 1.13E-04 |
| GO:0009890 | negative regulation of biosynthetic process               | 1.78E-21 | 1.78E-21 | GO:0000781 | chromosome, telomeric region     | 1.31E-04 | 1.31E-04 |

**Table S2. Gene Ontogeny terms of downregulated gene**

|                      | KEGG.ID    | Description                                 | P-Value  | FDR      |
|----------------------|------------|---------------------------------------------|----------|----------|
| <b>Upregulated</b>   | KEGG:01100 | Metabolic pathways                          | 2.10E-22 | 2.10E-22 |
|                      | KEGG:04142 | Lysosome                                    | 1.39E-17 | 1.39E-17 |
|                      | KEGG:05171 | Coronavirus disease - COVID-19              | 8.92E-07 | 8.92E-07 |
|                      | KEGG:03010 | Ribosome                                    | 7.70E-06 | 7.70E-06 |
|                      | KEGG:04721 | Synaptic vesicle cycle                      | 5.38E-05 | 5.38E-05 |
|                      | KEGG:00511 | Other glycan degradation                    | 5.90E-05 | 5.90E-05 |
|                      | KEGG:00051 | Fructose and mannose metabolism             | 1.79E-04 | 1.79E-04 |
|                      | KEGG:00600 | Sphingolipid metabolism                     | 8.99E-04 | 8.99E-04 |
|                      | KEGG:04146 | Peroxisome                                  | 1.44E-03 | 1.44E-03 |
|                      | KEGG:04966 | Collecting duct acid secretion              | 1.85E-03 | 1.85E-03 |
|                      | KEGG:00052 | Galactose metabolism                        | 8.93E-03 | 8.93E-03 |
|                      | KEGG:00480 | Glutathione metabolism                      | 9.91E-03 | 9.91E-03 |
|                      | KEGG:05323 | Rheumatoid arthritis                        | 1.10E-02 | 1.10E-02 |
|                      | KEGG:00520 | Amino sugar and nucleotide sugar metabolism | 1.69E-02 | 1.69E-02 |
|                      | KEGG:05152 | Tuberculosis                                | 2.29E-02 | 2.29E-02 |
|                      | KEGG:04145 | Phagosome                                   | 2.88E-02 | 2.88E-02 |
|                      | KEGG:04144 | Endocytosis                                 | 3.17E-02 | 3.17E-02 |
|                      | KEGG:04932 | Non-alcoholic fatty liver disease           | 4.18E-02 | 4.18E-02 |
|                      | KEGG:00190 | Oxidative phosphorylation                   | 4.42E-02 | 4.42E-02 |
| <b>Downregulated</b> | KEGG:04110 | Cell cycle                                  | 2.64E-23 | 2.64E-23 |
|                      | KEGG:03013 | Nucleocytoplasmic transport                 | 1.61E-22 | 1.61E-22 |
|                      | KEGG:04390 | Hippo signaling pathway                     | 7.55E-11 | 7.55E-11 |
|                      | KEGG:03008 | Ribosome biogenesis in eukaryotes           | 1.19E-09 | 1.19E-09 |
|                      | KEGG:04520 | Adherens junction                           | 2.10E-08 | 2.10E-08 |
|                      | KEGG:05014 | Amyotrophic lateral sclerosis               | 4.28E-08 | 4.28E-08 |
|                      | KEGG:03040 | Spliceosome                                 | 6.77E-08 | 6.77E-08 |
|                      | KEGG:03082 | ATP-dependent chromatin remodeling          | 6.44E-07 | 6.44E-07 |
|                      | KEGG:04814 | Motor proteins                              | 8.86E-07 | 8.86E-07 |
|                      | KEGG:04530 | Tight junction                              | 1.20E-06 | 1.20E-06 |
|                      | KEGG:04810 | Regulation of actin cytoskeleton            | 1.22E-06 | 1.22E-06 |
|                      | KEGG:04120 | Ubiquitin mediated proteolysis              | 1.94E-06 | 1.94E-06 |
|                      | KEGG:03050 | Proteasome                                  | 2.97E-06 | 2.97E-06 |
|                      | KEGG:05203 | Viral carcinogenesis                        | 3.49E-06 | 3.49E-06 |
|                      | KEGG:04350 | TGF-beta signaling pathway                  | 5.76E-06 | 5.76E-06 |
|                      | KEGG:04218 | Cellular senescence                         | 8.73E-06 | 8.73E-06 |
|                      | KEGG:05132 | Salmonella infection                        | 9.66E-06 | 9.66E-06 |
|                      | KEGG:05017 | Spinocerebellar ataxia                      | 2.63E-05 | 2.63E-05 |



|            |                                                          |          |          |
|------------|----------------------------------------------------------|----------|----------|
| KEGG:05200 | Pathways in cancer                                       | 3.73E-05 | 3.73E-05 |
| KEGG:05205 | Proteoglycans in cancer                                  | 8.22E-05 | 8.22E-05 |
| KEGG:05161 | Hepatitis B                                              | 1.09E-04 | 1.09E-04 |
| KEGG:04510 | Focal adhesion                                           | 4.45E-04 | 4.45E-04 |
| KEGG:03030 | DNA replication                                          | 6.49E-04 | 6.49E-04 |
| KEGG:03015 | mRNA surveillance pathway                                | 1.00E-03 | 1.00E-03 |
| KEGG:05166 | Human T-cell leukemia virus 1 infection                  | 1.03E-03 | 1.03E-03 |
| KEGG:04550 | Signaling pathways regulating pluripotency of stem cells | 1.46E-03 | 1.46E-03 |
| KEGG:03083 | Polycomb repressive complex                              | 2.16E-03 | 2.16E-03 |
| KEGG:05170 | Human immunodeficiency virus 1 infection                 | 2.21E-03 | 2.21E-03 |
| KEGG:05165 | Human papillomavirus infection                           | 2.67E-03 | 2.67E-03 |
| KEGG:05100 | Bacterial invasion of epithelial cells                   | 2.73E-03 | 2.73E-03 |
| KEGG:03018 | RNA degradation                                          | 2.79E-03 | 2.79E-03 |
| KEGG:04310 | Wnt signaling pathway                                    | 3.03E-03 | 3.03E-03 |
| KEGG:05210 | Colorectal cancer                                        | 3.68E-03 | 3.68E-03 |
| KEGG:04114 | Oocyte meiosis                                           | 3.89E-03 | 3.89E-03 |
| KEGG:05211 | Renal cell carcinoma                                     | 5.85E-03 | 5.85E-03 |
| KEGG:04919 | Thyroid hormone signaling pathway                        | 6.92E-03 | 6.92E-03 |
| KEGG:05022 | Pathways of neurodegeneration - multiple diseases        | 1.04E-02 | 1.04E-02 |
| KEGG:04141 | Protein processing in endoplasmic reticulum              | 1.07E-02 | 1.07E-02 |
| KEGG:03440 | Homologous recombination                                 | 2.18E-02 | 2.18E-02 |
| KEGG:04360 | Axon guidance                                            | 2.30E-02 | 2.30E-02 |
| KEGG:05225 | Hepatocellular carcinoma                                 | 2.76E-02 | 2.76E-02 |
| KEGG:05010 | Alzheimer disease                                        | 3.44E-02 | 3.44E-02 |
| KEGG:05169 | Epstein-Barr virus infection                             | 3.85E-02 | 3.85E-02 |
| KEGG:04152 | AMPK signaling pathway                                   | 4.33E-02 | 4.33E-02 |
| KEGG:01524 | Platinum drug resistance                                 | 4.67E-02 | 4.67E-02 |

---

**Table S3. KEGG pathways of upregulated and downregulated genes**

| Sample ID  | Total Sequences | % GC | Average Read Length | Adapter Contamination |
|------------|-----------------|------|---------------------|-----------------------|
| Ctrl1_1.fq | 20764657        | 48   | 150                 | PASS                  |
| Ctrl1_2.fq | 20764657        | 49   | 150                 | PASS                  |
| Ctrl2_1.fq | 23698911        | 48   | 150                 | PASS                  |
| Ctrl2_2.fq | 23698911        | 49   | 150                 | PASS                  |
| Ctrl3_1.fq | 21041746        | 48   | 150                 | PASS                  |
| Ctrl3_2.fq | 21041746        | 49   | 150                 | PASS                  |
| PDM1_1.fq  | 22688421        | 49   | variable(31-150)    | PASS                  |
| PDM1_2.fq  | 22688421        | 50   | variable(31-150)    | PASS                  |
| PDM2_1.fq  | 24738849        | 49   | variable(31-150)    | PASS                  |
| PDM2_2.fq  | 24738849        | 50   | variable(31-150)    | PASS                  |
| PDM3_1.fq  | 22512738        | 49   | 150                 | PASS                  |
| PDM3_2.fq  | 22512738        | 50   | 150                 | PASS                  |

**Table S4. Summary of FastQC Results for Each Sample**

| Sample ID | Total Reads | Uniquely Mapped (%) | Multi-mapped (%) | Unmapped (%) | Overall Mapping Rate (%) |
|-----------|-------------|---------------------|------------------|--------------|--------------------------|
| Ctrl_1    | 20764657    | 92.56               | 2.11             | 5.29         | 94.71                    |
| Ctrl_2    | 24738849    | 87.53               | 2.07             | 10.23        | 89.77                    |
| Ctrl_3    | 21041746    | 93.10               | 2.24             | 4.57         | 95.43                    |
| PDM_1     | 20263113    | 89.31               | 1.9              | 8.66         | 91.34                    |
| PDM_2     | 21654408    | 87.53               | 2.07             | 10.23        | 89.77                    |
| PDM_3     | 19788374    | 87.9                | 1.9              | 10.11        | 89.89                    |

**Table S5. Summary of STAR Alignment Results for Each Sample**

| Sample ID | Assigned Reads | %Assigned | Unassigned Multimapping | Unassigned No Feature | Unassigned Ambiguous |
|-----------|----------------|-----------|-------------------------|-----------------------|----------------------|
| Ctrl_1    | 32634535       | 80.39     | 2159066                 | 4807004               | 996983               |
| Ctrl_2    | 36683798       | 79.34     | 2425776                 | 6006865               | 1120331              |
| Ctrl_3    | 33101824       | 79.63     | 2386066                 | 5047952               | 1031762              |
| PDM_1     | 34555242       | 80.74     | 2270630                 | 4728855               | 1242129              |
| PDM_2     | 37375826       | 81.11     | 2771318                 | 4520290               | 1412700              |
| PDM_3     | 33932825       | 81.14     | 2245330                 | 4374939               | 1268984              |

**Table S6. Summary of featureCounts Quantification Results for Each Sample**
